# Supplementary material for: Achievability of the Paris targets in the EU—the role of demand-side-driven mitigation in different types of scenarios
Source: Springer Nature journal article supplement (doi:10.1007/s12053-018-9670-4), 2018-05-10

'Achievability of the Paris targets in the EU – the role of demand-side driven mitigation in different types of scenarios'

- Supplementary Material: Results of the index decomposition with (w/ steps) and without (w/o steps) time steps

**Index decomposition - Overall**

|                             | 2010-2020      | 2010-2030       | 2010-2040       | 2010-2050       | 2010-2050     | 2010-2050       | 2010-2050     |
|-----------------------------|----------------|-----------------|-----------------|-----------------|---------------|-----------------|---------------|
| IMAGE 450-NucOff-OPT        | w/ steps       | w/ steps        | w/ steps        | w/ steps        | w/ steps      | w/o steps       | w/o steps     |
|                             | Mt CO2/a       | Mt CO2/a        | Mt CO2/a        | Mt CO2/a        | %             | Mt CO2/a        | %             |
| CO2 capture + sequestration | -5,00          | -752,09         | -1173,01        | -1524,86        | -32,9%        | -1524,86        | -32,9%        |
| Population                  | 86,80          | 117,82          | 112,01          | 92,61           | 2,0%          | 58,11           | 1,3%          |
| Energy use per capita       | -263,16        | -389,81         | -391,34         | -521,14         | -11,3%        | -490,05         | -10,6%        |
| Electrification             | 89,31          | 109,41          | 102,77          | 76,25           | 1,6%          | 74,39           | 1,6%          |
| Renewable fuels + heat      | -4,97          | -144,67         | -374,81         | -686,05         | -14,8%        | -726,61         | -15,7%        |
| CO2 intensity power + heat  | -536,12        | -1096,99        | -1356,71        | -1408,32        | -30,4%        | -1402,93        | -30,3%        |
| CO2 intensity fossil fuels  | -54,34         | -165,11         | -199,95         | -170,42         | -3,7%         | -129,99         | -2,8%         |
| <b>Total</b>                | <b>-687,47</b> | <b>-2321,44</b> | <b>-3281,03</b> | <b>-4141,93</b> | <b>-89,5%</b> | <b>-4141,93</b> | <b>-89,5%</b> |

**Index decomposition - Transport**

|                            | 2010-2020      | 2010-2030      | 2010-2040      | 2010-2050      | 2010-2050     | 2010-2050      | 2010-2050     |
|----------------------------|----------------|----------------|----------------|----------------|---------------|----------------|---------------|
| IMAGE 450-NucOff-OPT       | w/ steps       | w/ steps       | w/ steps       | w/ steps       | w/ steps      | w/o steps      | w/o steps     |
|                            | Mt CO2/a       | Mt CO2/a       | Mt CO2/a       | Mt CO2/a       | %             | Mt CO2/a       | %             |
| Population                 | 22,00          | 30,54          | 28,86          | 24,36          | 2,1%          | 12,59          | 1,1%          |
| Activity                   | 75,53          | 140,79         | 194,60         | 231,77         | 20,3%         | 187,80         | 16,5%         |
| Energy intensity           | -146,96        | -244,82        | -285,85        | -379,99        | -33,3%        | -319,09        | -28,0%        |
| Electrification            | -5,09          | -9,78          | -12,01         | -17,79         | -1,6%         | -19,56         | -1,7%         |
| Biofuels                   | -33,98         | -129,97        | -176,37        | -117,70        | -10,3%        | -133,69        | -11,7%        |
| Hydrogen                   | 0,00           | -7,51          | -144,35        | -524,76        | -46,0%        | -531,85        | -46,7%        |
| CO2 intensity fossil fuels | -20,63         | -30,16         | -24,33         | 9,27           | 0,8%          | 28,98          | 2,5%          |
| <b>Total</b>               | <b>-109,12</b> | <b>-250,92</b> | <b>-419,45</b> | <b>-774,83</b> | <b>-68,0%</b> | <b>-774,83</b> | <b>-68,0%</b> |

**Index decomposition - Buildings**

|                            | 2010-2020     | 2010-2030     | 2010-2040      | 2010-2050      | 2010-2050     | 2010-2050      | 2010-2050     |
|----------------------------|---------------|---------------|----------------|----------------|---------------|----------------|---------------|
| IMAGE 450-NucOff-OPT       | w/ steps      | w/ steps      | w/ steps       | w/ steps       | w/ steps      | w/o steps      | w/o steps     |
|                            | Mt CO2/a      | Mt CO2/a      | Mt CO2/a       | Mt CO2/a       | %             | Mt CO2/a       | %             |
| Population                 | 12,78         | 18,06         | 16,95          | 13,36          | 2,1%          | 9,17           | 1,4%          |
| Energy use per capita      | -29,42        | -39,92        | -56,15         | -75,16         | -11,7%        | -69,71         | -10,9%        |
| Electrification            | -33,81        | -48,53        | -82,18         | -127,90        |               | -124,73        |               |
| Renewable fuels + heat     | 21,65         | 32,70         | 35,89          | 36,03          | 5,6%          | 32,33          | 5,0%          |
| District heat              | 0,00          | 0,00          | 0,00           | 0,00           | 0,0%          | 0,00           | 0,0%          |
| CO2 intensity fossil fuels | -7,28         | -6,05         | -59,47         | -108,27        | -16,9%        | -112,70        | -17,5%        |
| <b>Total</b>               | <b>-57,73</b> | <b>-76,43</b> | <b>-180,85</b> | <b>-297,97</b> | <b>-46,4%</b> | <b>-297,97</b> | <b>-46,4%</b> |

**Index decomposition - Industry**

|                             | 2010-2020      | 2010-2030      | 2010-2040      | 2010-2050      | 2010-2050     | 2010-2050      | 2010-2050     |
|-----------------------------|----------------|----------------|----------------|----------------|---------------|----------------|---------------|
| IMAGE 450-NucOff-OPT        | w/ steps       | w/ steps       | w/ steps       | w/ steps       | w/ steps      | w/o steps      | w/o steps     |
|                             | Mt CO2/a       | Mt CO2/a       | Mt CO2/a       | Mt CO2/a       | %             | Mt CO2/a       | %             |
| CO2 capture + sequestration | -5,00          | -2,42          | -63,03         | -143,09        | -15,5%        | -143,09        | -15,5%        |
| Population                  | 17,44          | 23,46          | 22,34          | 17,96          | 2,0%          | 12,81          | 1,4%          |
| Energy use per capita       | -63,72         | -103,64        | -92,96         | -108,84        | -11,8%        | -100,08        | -10,9%        |
| Electrification             | -41,07         | -96,08         | -123,15        | -146,45        | -15,9%        | -167,20        | -18,2%        |
| Renewable fuels + heat      | -4,92          | -67,88         | -136,45        | -206,64        | -22,4%        | -240,35        | -26,1%        |
| Combined heat + power       | -3,66          | -3,61          | -0,08          | -0,71          | -0,1%         | -0,05          | 0,0%          |
| CO2 intensity fossil fuels  | -23,49         | -108,26        | -78,97         | 29,45          | 3,2%          | 79,66          | 8,7%          |
| <b>Total</b>                | <b>-124,42</b> | <b>-358,42</b> | <b>-472,29</b> | <b>-558,31</b> | <b>-60,6%</b> | <b>-558,31</b> | <b>-60,6%</b> |

**Index decomposition - Energy supply**

|                             | 2010-2020      | 2010-2030       | 2010-2040       | 2010-2050       | 2010-2050      | 2010-2050       | 2010-2050      |
|-----------------------------|----------------|-----------------|-----------------|-----------------|----------------|-----------------|----------------|
| IMAGE 450-NucOff-OPT        | w/ steps       | w/ steps        | w/ steps        | w/ steps        | w/ steps       | w/o steps       | w/o steps      |
|                             | Mt CO2/a       | Mt CO2/a        | Mt CO2/a        | Mt CO2/a        | %              | Mt CO2/a        | %              |
| CO2 capture + sequestration | 0,00           | -749,67         | -1109,99        | -1381,77        | -86,9%         | -1381,77        | -86,9%         |
| Population                  | 29,06          | 38,53           | 36,90           | 30,88           | 1,9%           | 20,16           | 1,3%           |
| Electricity use per capita  | 122,80         | 197,40          | 254,12          | 289,87          | 18,2%          | 305,18          | 19,2%          |
| Renewable electricity       | -355,33        | -1189,55        | -1635,08        | -1825,64        | -114,7%        | -1777,42        | -111,7%        |
| Nuclear                     | 100,24         | 368,80          | 535,40          | 599,61          | 37,7%          | 415,14          | 26,1%          |
| Import                      | 0,00           | 0,00            | 0,00            | 0,00            | 0,0%           | 0,00            | 0,0%           |
| Emission factor             | -203,30        | -138,44         | -89,55          | 21,15           | 1,3%           | 152,80          | 9,6%           |
| <b>Total</b>                | <b>-306,53</b> | <b>-1472,94</b> | <b>-2008,20</b> | <b>-2265,91</b> | <b>-142,4%</b> | <b>-2265,91</b> | <b>-142,4%</b> |

**Based on the following sources:**

IMAGE 450-NucOff-OPT: AMPERE database, <https://tntcat.iiasa.ac.at/AMPEREDB/dsd?Action=htmlpage&page=welcome>

PRIMES HiEffHiRES: AMPERE database, <https://tntcat.iiasa.ac.at/AMPEREDB/dsd?Action=htmlpage&page=welcome>

France-negaWatt: "Scenario négaWatt 2050" (négaWatt Association 2014),

Germany-KS95: "Climate protection scenario 2050", KS95 run (Repenning et al. 2015),

Italy-DDPP-DRS: "Pathways to deep decarbonisation in Italy", demand reduction scenario (Viridis et al. 2015)

UK-ZCB2030: "Zero Carbon Britain 2030" (Allen et al. 2013).

'Achievability of the Paris targets in the EU – the role of demand-side driven mitigation in different types of scenarios'  
 - Supplementary Material: Results of the index decomposition with (w/ steps) and without (w/o steps) time steps

| Index decomposition - Overall |                |                 |                 |                 |              |                 |              |
|-------------------------------|----------------|-----------------|-----------------|-----------------|--------------|-----------------|--------------|
|                               | 2010-2020      | 2010-2030       | 2010-2040       | 2010-2050       | 2010-2050    | 2010-2050       | 2010-2050    |
| PRIMES HiEffHiRES             | w/ steps       | w/ steps        | w/ steps        | w/ steps        | w/ steps     | w/o steps       | w/o steps    |
|                               | Mt CO2/a       | Mt CO2/a        | Mt CO2/a        | Mt CO2/a        | %            | Mt CO2/a        | %            |
| CO2 capture + sequestration   | -12,18         | -14,34          | -94,58          | -248,67         | -0,06        | -248,67         | -0,06        |
| Population                    | 105,13         | 140,79          | 141,47          | 129,22          | 0,03         | 65,31           | 0,02         |
| Energy use per capita         | -113,74        | -380,12         | -629,86         | -841,09         | -0,21        | -815,91         | -0,21        |
| Electrification               | 49,94          | 39,06           | -43,12          | -117,59         | -0,03        | -124,41         | -0,03        |
| Renewable fuels + heat        | -76,87         | -98,89          | -300,84         | -544,93         | -0,14        | -548,60         | -0,14        |
| CO2 intensity power + heat    | -514,75        | -953,00         | -1232,20        | -1401,84        | -0,35        | -1300,44        | -0,33        |
| CO2 intensity fossil fuels    | 5,12           | -53,51          | -86,25          | -264,93         | -0,07        | -317,11         | -0,08        |
| <b>Total</b>                  | <b>-557,36</b> | <b>-1320,02</b> | <b>-2245,37</b> | <b>-3289,83</b> | <b>-0,83</b> | <b>-3289,83</b> | <b>-0,83</b> |

| Index decomposition - Transport |               |                |                |                |               |                |               |
|---------------------------------|---------------|----------------|----------------|----------------|---------------|----------------|---------------|
|                                 | 2010-2020     | 2010-2030      | 2010-2040      | 2010-2050      | 2010-2050     | 2010-2050      | 2010-2050     |
| PRIMES HiEffHiRES               | w/ steps      | w/ steps       | w/ steps       | w/ steps       | w/ steps      | w/o steps      | w/o steps     |
|                                 | Mt CO2/a      | Mt CO2/a       | Mt CO2/a       | Mt CO2/a       | %             | Mt CO2/a       | %             |
| Population                      | 29,21         | 40,14          | 40,35          | 36,50          | 3,5%          | 19,10          | 1,8%          |
| Activity                        | 118,44        | 178,32         | 221,89         | 235,31         | 22,4%         | 168,31         | 16,1%         |
| Energy intensity                | -138,86       | -300,09        | -478,34        | -563,84        | -53,8%        | -472,83        | -45,1%        |
| Electrification                 | -13,61        | -66,32         | -161,54        | -209,97        | -20,0%        | -207,79        | -19,8%        |
| Biofuels                        | -43,71        | -46,05         | -136,80        | -234,23        | -22,3%        | -242,15        | -23,1%        |
| Hydrogen                        | -0,03         | -0,04          | -0,06          | -0,08          | 0,0%          | -0,07          | 0,0%          |
| CO2 intensity fossil fuels      | 0,62          | 1,22           | 2,50           | 1,90           | 0,2%          | 1,02           | 0,1%          |
| <b>Total</b>                    | <b>-47,95</b> | <b>-192,82</b> | <b>-511,99</b> | <b>-734,41</b> | <b>-70,1%</b> | <b>-734,41</b> | <b>-70,1%</b> |

| Index decomposition - Buildings |                |                |                |                |               |                |               |
|---------------------------------|----------------|----------------|----------------|----------------|---------------|----------------|---------------|
|                                 | 2010-2020      | 2010-2030      | 2010-2040      | 2010-2050      | 2010-2050     | 2010-2050      | 2010-2050     |
| PRIMES HiEffHiRES               | w/ steps       | w/ steps       | w/ steps       | w/ steps       | w/ steps      | w/o steps      | w/o steps     |
|                                 | Mt CO2/a       | Mt CO2/a       | Mt CO2/a       | Mt CO2/a       | %             | Mt CO2/a       | %             |
| Population                      | 16,38          | 21,69          | 21,79          | 20,35          | 3,2%          | 8,95           | 1,4%          |
| Energy use per capita           | -40,67         | -112,49        | -158,60        | -195,25        | -30,3%        | -175,62        | -27,3%        |
| Electrification                 | -95,91         | -131,76        | -231,04        | -337,86        |               | -358,25        |               |
| Renewable fuels + heat          | -32,38         | -51,74         | -110,58        | -184,25        | -28,6%        | -204,88        | -31,8%        |
| District heat                   | 3,44           | 4,37           | 11,16          | 15,49          | 2,4%          | 19,41          | 3,0%          |
| CO2 intensity fossil fuels      | -13,54         | -27,05         | -37,07         | -37,54         | -5,8%         | -25,38         | -3,9%         |
| <b>Total</b>                    | <b>-133,73</b> | <b>-249,61</b> | <b>-404,92</b> | <b>-550,30</b> | <b>-85,5%</b> | <b>-550,30</b> | <b>-85,5%</b> |

| Index decomposition - Industry |               |                |                |                |               |                |               |
|--------------------------------|---------------|----------------|----------------|----------------|---------------|----------------|---------------|
|                                | 2010-2020     | 2010-2030      | 2010-2040      | 2010-2050      | 2010-2050     | 2010-2050      | 2010-2050     |
| PRIMES HiEffHiRES              | w/ steps      | w/ steps       | w/ steps       | w/ steps       | w/ steps      | w/o steps      | w/o steps     |
|                                | Mt CO2/a      | Mt CO2/a       | Mt CO2/a       | Mt CO2/a       | %             | Mt CO2/a       | %             |
| CO2 capture + sequestration    | -1,11         | -1,74          | -9,59          | -63,50         | -8,2%         | -63,50         | -8,2%         |
| Population                     | 21,64         | 30,01          | 30,21          | 26,47          | 3,4%          | 15,01          | 1,9%          |
| Energy use per capita          | -4,58         | -10,37         | -27,50         | -60,36         | -7,8%         | -58,91         | -7,6%         |
| Electrification                | 0,38          | 2,08           | -19,05         | -62,71         | -8,1%         | -58,86         | -7,6%         |
| Renewable fuels + heat         | -8,80         | -25,38         | -51,39         | -86,79         | -11,2%        | -74,13         | -9,5%         |
| Combined heat + power          | -105,69       | -129,54        | -146,51        | -150,54        | -19,3%        | -112,78        | -14,5%        |
| CO2 intensity fossil fuels     | 58,53         | 34,42          | 12,98          | -176,29        | -22,7%        | -220,56        | -28,3%        |
| <b>Total</b>                   | <b>-39,65</b> | <b>-100,52</b> | <b>-210,85</b> | <b>-573,73</b> | <b>-73,7%</b> | <b>-573,73</b> | <b>-73,7%</b> |

**Index decomposition - Energy supply**

| PRIMES HiEffHiRES           | 2010-2020            | 2010-2030            | 2010-2040            | 2010-2050            | 2010-2050     | 2010-2050             | 2010-2050      |
|-----------------------------|----------------------|----------------------|----------------------|----------------------|---------------|-----------------------|----------------|
|                             | w/ steps<br>Mt CO2/a | w/ steps<br>Mt CO2/a | w/ steps<br>Mt CO2/a | w/ steps<br>Mt CO2/a | w/ steps<br>% | w/o steps<br>Mt CO2/a | w/o steps<br>% |
| CO2 capture + sequestration | -11,06               | -12,60               | -85,00               | -185,17              | -14,9%        | -185,17               | -14,9%         |
| Population                  | 31,12                | 39,77                | 39,90                | 37,33                | 3,0%          | 18,16                 | 1,5%           |
| Electricity use per capita  | 103,74               | 74,78                | 131,25               | 158,69               | 12,8%         | 162,35                | 13,1%          |
| Renewable electricity       | -392,55              | -821,04              | -1040,84             | -1213,35             | -97,8%        | -993,46               | -80,0%         |
| Nuclear                     | 68,62                | 204,65               | 284,73               | 348,18               | 28,0%         | 197,89                | 15,9%          |
| Import                      | -19,45               | -4,27                | 6,40                 | 10,71                | 0,9%          | 8,92                  | 0,7%           |
| Emission factor             | -79,33               | -186,90              | -302,08              | -374,31              | -30,2%        | -426,62               | -34,4%         |
| <b>Total</b>                | <b>-298,92</b>       | <b>-705,62</b>       | <b>-965,63</b>       | <b>-1217,92</b>      | <b>-98,1%</b> | <b>-1217,92</b>       | <b>-98,1%</b>  |

**Based on the following sources:**

IMAGE 450-NucOff-OPT: AMPERE database, <https://tntcat.iiasa.ac.at/AMPEREDB/dsd?Action=htmlpage&page=welcome>

PRIMES HiEffHiRES: AMPERE database, <https://tntcat.iiasa.ac.at/AMPEREDB/dsd?Action=htmlpage&page=welcome>

France-negaWatt: "Scenario négaWatt 2050" (négaWatt Association 2014),

Germany-KS95: "Climate protection scenario 2050", KS95 run (Repenning et al. 2015),

Italy-DDPP-DRS: "Pathways to deep decarbonisation in Italy", demand reduction scenario (Viridis et al. 2015)

UK-ZCB2030: "Zero Carbon Britain 2030" (Allen et al. 2013).

'Achievability of the Paris targets in the EU – the role of demand-side driven mitigation in different types of scenarios'

- Supplementary Material: Results of the index decomposition with (w/ steps) and without (w/o steps) time steps

**Index decomposition - Overall**

|                             | 2010-2020      | 2010-2030      | 2010-2040      | 2010-2050      | 2010-2050     | 2010-2050      | 2010-2050     |
|-----------------------------|----------------|----------------|----------------|----------------|---------------|----------------|---------------|
| Germany-KS95                | w/ steps       | w/ steps       | w/ steps       | w/ steps       | w/ steps      | w/o steps      | w/o steps     |
|                             | Mt CO2/a       | Mt CO2/a       | Mt CO2/a       | Mt CO2/a       | %             | Mt CO2/a       | %             |
| CO2 capture + sequestration | 0              | -3,7           | -7,1           | -11,7          | -1,4%         | -11,70         | -1,4%         |
| Population                  | -15,97         | -22,50         | -27,59         | -30,49         | -3,6%         | -23,29         | -2,8%         |
| Energy use per capita       | -103,99        | -203,70        | -257,50        | -269,18        | -31,9%        | -186,96        | -22,2%        |
| Electrification             | 5,03           | 5,97           | -13,90         | -36,68         | -4,3%         | -58,60         | -6,9%         |
| Renewable fuels + heat      | -26,39         | -63,55         | -128,66        | -147,32        | -17,5%        | -158,21        | -18,8%        |
| CO2 intensity power + heat  | -112,68        | -212,02        | -256,34        | -328,59        | -39,0%        | -357,74        | -42,4%        |
| CO2 intensity fossil fuels  | -1,60          | 12,63          | 25,18          | 14,05          | 1,7%          | -13,40         | -1,6%         |
| <b>Total</b>                | <b>-255,61</b> | <b>-486,87</b> | <b>-665,90</b> | <b>-809,91</b> | <b>-96,0%</b> | <b>-809,91</b> | <b>-96,0%</b> |

**Index decomposition - Transport**

|                            | 2010-2020     | 2010-2030     | 2010-2040      | 2010-2050      | 2010-2050     | 2010-2050      | 2010-2050     |
|----------------------------|---------------|---------------|----------------|----------------|---------------|----------------|---------------|
| Germany-KS95               | w/ steps      | w/ steps      | w/ steps       | w/ steps       | w/ steps      | w/o steps      | w/o steps     |
|                            | Mt CO2/a      | Mt CO2/a      | Mt CO2/a       | Mt CO2/a       | %             | Mt CO2/a       | %             |
| Population                 | -3,73         | -5,59         | -7,00          | -7,64          | -4,2%         | -4,91          | -2,7%         |
| Activity                   | 31,66         | 42,29         | 47,16          | 48,26          | 26,8%         | 22,39          | 12,4%         |
| Energy intensity           | -52,36        | -92,14        | -118,05        | -124,11        | -69,0%        | -72,08         | -40,1%        |
| Electrification            | -2,55         | -8,36         | -27,32         | -43,32         | -24,1%        | -57,81         | -32,1%        |
| Biofuels                   | -1,61         | -0,77         | -33,22         | -44,58         | -24,8%        | -59,14         | -32,9%        |
| Hydrogen                   | 0,00          | 0,00          | 0,00           | 0,00           | 0,0%          | 0,00           | 0,0%          |
| CO2 intensity fossil fuels | 0,33          | -0,71         | 0,70           | 0,75           | 0,4%          | 0,90           | 0,5%          |
| <b>Total</b>               | <b>-28,27</b> | <b>-65,29</b> | <b>-137,73</b> | <b>-170,65</b> | <b>-94,9%</b> | <b>-170,65</b> | <b>-94,9%</b> |

**Index decomposition - Buildings**

|                            | 2010-2020     | 2010-2030      | 2010-2040      | 2010-2050      | 2010-2050     | 2010-2050      | 2010-2050     |
|----------------------------|---------------|----------------|----------------|----------------|---------------|----------------|---------------|
| Germany-KS95               | w/ steps      | w/ steps       | w/ steps       | w/ steps       | w/ steps      | w/o steps      | w/o steps     |
|                            | Mt CO2/a      | Mt CO2/a       | Mt CO2/a       | Mt CO2/a       | %             | Mt CO2/a       | %             |
| Population                 | -2,87         | -3,92          | -4,49          | -4,77          | -3,2%         | -3,74          | -2,5%         |
| Energy use per capita      | -25,63        | -44,89         | -51,30         | -52,10         | -34,6%        | -33,29         | -22,1%        |
| Electrification            | -17,02        | -51,61         | -78,63         | -87,57         |               | -106,83        |               |
| Renewable fuels + heat     | -15,23        | -34,38         | -47,54         | -49,75         | -33,1%        | -54,15         | -36,0%        |
| District heat              | -1,63         | -5,63          | -5,14          | -3,75          | -2,5%         | -4,86          | -3,2%         |
| CO2 intensity fossil fuels | 1,04          | 0,11           | -0,55          | -0,54          | -0,4%         | -1,12          | -0,7%         |
| <b>Total</b>               | <b>-44,48</b> | <b>-100,31</b> | <b>-134,97</b> | <b>-144,98</b> | <b>-96,4%</b> | <b>-144,98</b> | <b>-96,4%</b> |

**Index decomposition - Industry**

|                             | 2010-2020     | 2010-2030     | 2010-2040     | 2010-2050      | 2010-2050      | 2010-2050      | 2010-2050      |
|-----------------------------|---------------|---------------|---------------|----------------|----------------|----------------|----------------|
| Germany-KS95                | w/ steps      | w/ steps      | w/ steps      | w/ steps       | w/ steps       | w/o steps      | w/o steps      |
|                             | Mt CO2/a      | Mt CO2/a      | Mt CO2/a      | Mt CO2/a       | %              | Mt CO2/a       | %              |
| CO2 capture + sequestration | 0,00          | -3,70         | -7,10         | -11,70         | -10,1%         | -11,70         | -10,1%         |
| Population                  | -2,26         | -3,29         | -4,18         | -4,71          | -4,1%          | -3,47          | -3,0%          |
| Energy use per capita       | -8,27         | -19,00        | -24,43        | -25,84         | -22,3%         | -17,31         | -14,9%         |
| Electrification             | -4,27         | -9,29         | -15,60        | -20,02         | -17,3%         | -17,25         | -14,9%         |
| Renewable fuels + heat      | -9,37         | -30,43        | -48,34        | -53,29         | -46,0%         | -37,72         | -32,6%         |
| Combined heat + power       | -13,48        | -12,65        | -7,58         | -4,57          | -3,9%          | -1,39          | -1,2%          |
| CO2 intensity fossil fuels  | 8,06          | 19,86         | 17,93         | 0,83           | 0,7%           | -30,46         | -26,3%         |
| <b>Total</b>                | <b>-29,60</b> | <b>-58,50</b> | <b>-89,30</b> | <b>-119,30</b> | <b>-103,0%</b> | <b>-119,30</b> | <b>-103,0%</b> |

**Index decomposition - Energy supply**

|                             | 2010-2020      | 2010-2030      | 2010-2040      | 2010-2050      | 2010-2050     | 2010-2050      | 2010-2050     |
|-----------------------------|----------------|----------------|----------------|----------------|---------------|----------------|---------------|
| Germany-KS95                | w/ steps       | w/ steps       | w/ steps       | w/ steps       | w/ steps      | w/o steps      | w/o steps     |
|                             | Mt CO2/a       | Mt CO2/a       | Mt CO2/a       | Mt CO2/a       | %             | Mt CO2/a       | %             |
| CO2 capture + sequestration | 0,00           | 0,00           | 0,00           | 0,00           | 0,0%          | 0,00           | 0,0%          |
| Population                  | -6,36          | -8,54          | -10,35         | -11,41         | -3,1%         | -8,99          | -2,5%         |
| Electricity use per capita  | -50,50         | -52,32         | -23,02         | -16,23         | -4,4%         | 32,83          | 9,0%          |
| Renewable electricity       | -146,68        | -231,18        | -272,53        | -351,91        | -96,4%        | -364,77        | -99,9%        |
| Nuclear                     | 43,78          | 86,68          | 86,68          | 86,68          | 23,7%         | 33,56          | 9,2%          |
| Import                      | -12,26         | -27,59         | -37,07         | -25,52         | -7,0%         | -5,67          | -1,6%         |
| Emission factor             | 18,45          | -22,43         | -30,94         | -34,00         | -9,3%         | -39,34         | -10,8%        |
| <b>Total</b>                | <b>-153,57</b> | <b>-255,39</b> | <b>-287,23</b> | <b>-352,39</b> | <b>-96,5%</b> | <b>-352,39</b> | <b>-96,5%</b> |

**Based on the following sources:**

AMPERE database, <https://tntcat.iiasa.ac.at/AMPEREDB/dsd?Action=htmlpage&page=welcome>

AMPERE database, <https://tntcat.iiasa.ac.at/AMPEREDB/dsd?Action=htmlpage&page=welcome>

“Scenario négaWatt 2050” (négaWatt Association 2014),

“Climate protection scenario 2050”, KS95 run (Repenning et al. 2015),

“Pathways to deep decarbonisation in Italy”, demand reduction scenario (Viridis et al. 2015)

“Zero Carbon Britain 2030” (Allen et al. 2013).

**'Achievability of the Paris targets in the EU – the role of demand-side driven mitigation in different types of scenarios'**

- Supplementary Material: Results of the index decomposition with (w/ steps) and without (w/o steps) time steps

**Index decomposition - Overall**

|                             | 2010-2020         | 2010-2030         | 2010-2040         | 2010-2050         | 2010-2050     | 2010-2050         | 2010-2050     |
|-----------------------------|-------------------|-------------------|-------------------|-------------------|---------------|-------------------|---------------|
| France-negaWatt             | w/ steps          | w/ steps          | w/ steps          | w/ steps          | w/ steps      | w/o steps         | w/o steps     |
|                             | Mt CO2/a          | Mt CO2/a          | Mt CO2/a          | Mt CO2/a          | %             | Mt CO2/a          | %             |
| CO2 capture + sequestration | 0                 | 0                 | 0                 | 0                 | 0,0%          | 0,00              | 0,0%          |
| Population                  | 15,686314         | 24,65187          | 28,441448         | 29,412001         | 8,2%          | 17,365984         | 4,8%          |
| Energy use per capita       | -48,096132        | -119,42142        | -160,11646        | -166,92472        | -46,3%        | -117,43365        | -32,6%        |
| Electrification             | -8,5198378        | -17,064568        | -30,181018        | -32,672971        | -9,1%         | -45,328179        | -12,6%        |
| Renewable fuels + heat      | -20,138084        | -45,837013        | -76,188954        | -106,89424        | -29,7%        | -125,87803        | -34,9%        |
| CO2 intensity power + heat  | 1,1806935         | -7,7903372        | -23,605411        | -29,388968        | -8,2%         | -32,42324         | -9,0%         |
| CO2 intensity fossil fuels  | -2,7214547        | -13,953048        | -24,203853        | -29,042835        | -8,1%         | -31,814611        | -8,8%         |
| <b>Total</b>                | <b>-62,608501</b> | <b>-179,41451</b> | <b>-285,85425</b> | <b>-335,51173</b> | <b>-93,1%</b> | <b>-335,51173</b> | <b>-93,1%</b> |

**Index decomposition - Transport**

|                            | 2010-2020        | 2010-2030        | 2010-2040         | 2010-2050        | 2010-2050         | 2010-2050        | 2010-2050         |
|----------------------------|------------------|------------------|-------------------|------------------|-------------------|------------------|-------------------|
| France-negaWatt            | w/ steps         | w/ steps         | w/ steps          | w/ steps         | w/ steps          | w/o steps        | w/o steps         |
|                            | Mt CO2/a         | Mt CO2/a         | Mt CO2/a          | Mt CO2/a         | %                 | Mt CO2/a         | %                 |
| Population                 | 6,9915699        | 11,044651        | 12,652644         | 13,09197         | 0,0833293         | 8,1472876        | 0,0518568         |
| Activity                   | -5,2940481       | -11,759916       | -15,116625        | -15,62913        | -0,0994781        | -11,021692       | -0,0701522        |
| Energy intensity           | -21,181178       | -56,28622        | -79,505153        | -80,4092         | -0,511798         | -57,168137       | -0,3638705        |
| Electrification            | -1,2061281       | -5,5059923       | -11,211332        | -11,612402       | -0,073912         | -16,499454       | -0,1050177        |
| Biofuels                   | 0,306646         | -6,3845746       | -22,582674        | -38,799544       | -0,2469559        | -62,836096       | -0,3999466        |
| Hydrogen                   | 0                | 0                | 0                 | 0                | 0                 | 0                | 0                 |
| CO2 intensity fossil fuels | -0,9965413       | -7,1874678       | -12,061339        | -10,252893       | -0,0652588        | -4,2331086       | -0,0269434        |
| <b>Total</b>               | <b>-21,37968</b> | <b>-76,07952</b> | <b>-127,82448</b> | <b>-143,6112</b> | <b>-0,9140736</b> | <b>-143,6112</b> | <b>-0,9140736</b> |

**Index decomposition - Buildings**

|                            | 2010-2020     | 2010-2030     | 2010-2040     | 2010-2050     | 2010-2050     | 2010-2050     | 2010-2050     |
|----------------------------|---------------|---------------|---------------|---------------|---------------|---------------|---------------|
| France-negaWatt            | w/ steps      | w/o steps     | w/o steps     |
|                            | Mt CO2/a      | Mt CO2/a      | Mt CO2/a      | Mt CO2/a      | %             | Mt CO2/a      | %             |
| Population                 | 3,86          | 5,91          | 6,79          | 7,02          | 7,6%          | 4,23          | 4,6%          |
| Energy use per capita      | -9,44         | -26,29        | -35,55        | -37,38        | -40,6%        | -28,33        | -30,8%        |
| Electrification            | -15,29        | -29,42        | -41,84        | -53,11        | 0,0%          | -59,24        | 0,0%          |
| Renewable fuels + heat     | -9,40         | -20,97        | -29,64        | -38,72        | -42,1%        | -40,90        | -44,4%        |
| District heat              | -4,50         | -8,32         | -10,64        | -11,92        | -12,9%        | -14,22        | -15,4%        |
| CO2 intensity fossil fuels | -1,04         | -2,38         | -2,58         | -3,31         | -3,6%         | -3,43         | -3,7%         |
| <b>Total</b>               | <b>-21,91</b> | <b>-52,18</b> | <b>-73,18</b> | <b>-86,77</b> | <b>-94,2%</b> | <b>-86,77</b> | <b>-94,2%</b> |

**Index decomposition - Industry**

|                             | 2010-2020     | 2010-2030     | 2010-2040     | 2010-2050     | 2010-2050     | 2010-2050     | 2010-2050     |
|-----------------------------|---------------|---------------|---------------|---------------|---------------|---------------|---------------|
| France-negaWatt             | w/ steps      | w/o steps     | w/o steps     |
|                             | Mt CO2/a      | Mt CO2/a      | Mt CO2/a      | Mt CO2/a      | %             | Mt CO2/a      | %             |
| CO2 capture + sequestration | 0,00          | 0,00          | 0,00          | 0,00          | 0,0%          | 0,00          | 0,0%          |
| Population                  | 2,92          | 4,53          | 5,34          | 5,55          | 7,7%          | 3,45          | 4,8%          |
| Energy use per capita       | -9,60         | -17,72        | -22,82        | -24,76        | -34,5%        | -18,36        | -25,6%        |
| Electrification             | -0,22         | -1,23         | -2,84         | -3,45         | -4,8%         | -4,88         | -6,8%         |
| Renewable fuels + heat      | -9,87         | -16,61        | -23,70        | -32,54        | -45,4%        | -32,84        | -45,8%        |
| Combined heat + power       | -2,97         | -4,76         | -6,59         | -7,81         | -10,9%        | -9,47         | -13,2%        |
| CO2 intensity fossil fuels  | -0,46         | -1,97         | -2,66         | -3,91         | -5,5%         | -4,80         | -6,7%         |
| <b>Total</b>                | <b>-20,20</b> | <b>-37,76</b> | <b>-53,27</b> | <b>-66,92</b> | <b>-93,3%</b> | <b>-66,92</b> | <b>-93,3%</b> |

**Index decomposition - Energy supply**

|                             | 2010-2020   | 2010-2030     | 2010-2040     | 2010-2050     | 2010-2050     | 2010-2050     | 2010-2050     |
|-----------------------------|-------------|---------------|---------------|---------------|---------------|---------------|---------------|
| France-negaWatt             | w/ steps    | w/ steps      | w/ steps      | w/ steps      | w/ steps      | w/o steps     | w/o steps     |
|                             | Mt CO2/a    | Mt CO2/a      | Mt CO2/a      | Mt CO2/a      | %             | Mt CO2/a      | %             |
| CO2 capture + sequestration | 0,00        | 0,00          | 0,00          | 0,00          | 0,0%          | 0,00          | 0,0%          |
| Population                  | 1,79        | 2,97          | 3,41          | 3,47          | 9,4%          | 1,31          | 3,6%          |
| Electricity use per capita  | -6,98       | -15,24        | -17,44        | -17,26        | -47,0%        | -5,15         | -14,0%        |
| Renewable electricity       | -17,98      | -51,08        | -78,48        | -84,60        | -230,5%       | -46,17        | -125,8%       |
| Nuclear                     | 38,79       | 66,91         | 78,43         | 78,43         | 213,7%        | 18,72         | 51,0%         |
| Import                      | 0,00        | 0,00          | 0,00          | 0,00          | 0,0%          | 0,00          | 0,0%          |
| Emission factor             | -14,16      | -15,81        | -15,78        | -15,95        | -43,5%        | -4,61         | -12,6%        |
| <b>Total</b>                | <b>1,46</b> | <b>-12,24</b> | <b>-29,86</b> | <b>-35,91</b> | <b>-97,8%</b> | <b>-35,91</b> | <b>-97,8%</b> |

**Based on the following sources:**

IMAGE 450-NucOff-OPT: AMPERE database, <https://tntcat.iiasa.ac.at/AMPEREDB/dsd?Action=htmlpage&page=welcome>

PRIMES HiEffHiRES: AMPERE database, <https://tntcat.iiasa.ac.at/AMPEREDB/dsd?Action=htmlpage&page=welcome>

France-negaWatt: "Scenario négaWatt 2050" (négaWatt Association 2014),

Germany-KS95: "Climate protection scenario 2050", KS95 run (Repenning et al. 2015),

Italy-DDPP-DRS: "Pathways to deep decarbonisation in Italy", demand reduction scenario (Viridis et al. 2015)

UK-ZCB2030: "Zero Carbon Britain 2030" (Allen et al. 2013).



'Achievability of the Paris targets in the EU – the role of demand-side driven mitigation in different types of scenarios'  
 - Supplementary Material: Results of the index decomposition with (w/ steps) and without (w/o steps) time steps

| Index decomposition - Overall |                |                |                |                |               |                |               |
|-------------------------------|----------------|----------------|----------------|----------------|---------------|----------------|---------------|
| Italy-DDPP-DRS                | 2010-2020      | 2010-2030      | 2010-2040      | 2010-2050      | 2010-2050     | 2010-2050      | 2010-2050     |
|                               | w/ steps       | w/ steps       | w/ steps       | w/ steps       | w/ steps      | w/o steps      | w/o steps     |
|                               | Mt CO2/a       | Mt CO2/a       | Mt CO2/a       | Mt CO2/a       | %             | Mt CO2/a       | %             |
| CO2 capture + sequestration   | 0,00           | 0,00           | -4,53          | -6,80          | -1,7%         | -6,80          | -1,7%         |
| Population                    | 18,03          | 22,06          | 23,25          | 22,67          | 5,6%          | 13,44          | 3,3%          |
| Energy use per capita         | -81,19         | -106,76        | -136,84        | -154,41        | -38,2%        | -127,76        | -31,6%        |
| Electrification               | 8,17           | 7,46           | 1,02           | -17,45         | -4,3%         | -18,93         | -4,7%         |
| Renewable fuels + heat        | -9,69          | -13,53         | -18,40         | -21,79         | -5,4%         | -20,49         | -5,1%         |
| CO2 intensity power + heat    | -62,82         | -91,56         | -131,18        | -146,52        | -36,2%        | -149,47        | -36,9%        |
| CO2 intensity fossil fuels    | 7,54           | 9,24           | 7,65           | -12,71         | -3,1%         | -26,99         | -6,7%         |
| <b>Total</b>                  | <b>-119,96</b> | <b>-173,09</b> | <b>-259,02</b> | <b>-337,01</b> | <b>-83,3%</b> | <b>-337,01</b> | <b>-83,3%</b> |

| Index decomposition - Transport |               |               |               |               |               |               |               |
|---------------------------------|---------------|---------------|---------------|---------------|---------------|---------------|---------------|
| Italy-DDPP-DRS                  | 2010-2020     | 2010-2030     | 2010-2040     | 2010-2050     | 2010-2050     | 2010-2050     | 2010-2050     |
|                                 | w/ steps      | w/o steps     | w/o steps     |
|                                 | Mt CO2/a      | Mt CO2/a      | Mt CO2/a      | Mt CO2/a      | %             | Mt CO2/a      | %             |
| Population                      | 3,75          | 5,21          | 5,71          | 5,45          | 4,6%          | 3,40          | 2,9%          |
| Activity                        | -0,35         | 7,45          | 6,09          | 0,60          | 0,5%          | -3,40         | -2,9%         |
| Energy intensity                | -21,14        | -34,57        | -47,67        | -53,53        | -45,4%        | -41,48        | -35,2%        |
| Electrification                 | -2,52         | -5,60         | -9,55         | -13,10        | -11,1%        | -13,42        | -11,4%        |
| Biofuels                        | -1,62         | -1,24         | -3,24         | -21,91        | -18,6%        | -26,61        | -22,5%        |
| Hydrogen                        | 0,00          | 0,00          | -0,33         | -1,33         | -1,1%         | -1,62         | -1,4%         |
| CO2 intensity fossil fuels      | 0,37          | 0,11          | -0,62         | -2,57         | -2,2%         | -3,25         | -2,8%         |
| <b>Total</b>                    | <b>-21,51</b> | <b>-28,64</b> | <b>-49,61</b> | <b>-86,40</b> | <b>-73,2%</b> | <b>-86,40</b> | <b>-73,2%</b> |

| Index decomposition - Buildings |               |               |                |                |                |                |                |
|---------------------------------|---------------|---------------|----------------|----------------|----------------|----------------|----------------|
| Italy-DDPP-DRS                  | 2010-2020     | 2010-2030     | 2010-2040      | 2010-2050      | 2010-2050      | 2010-2050      | 2010-2050      |
|                                 | w/ steps      | w/ steps      | w/ steps       | w/ steps       | w/ steps       | w/o steps      | w/o steps      |
|                                 | Mt CO2/a      | Mt CO2/a      | Mt CO2/a       | Mt CO2/a       | %              | Mt CO2/a       | %              |
| Population                      | 3,75          | 5,21          | 5,71           | 5,45           | 7,1%           | 3,40           | 4,4%           |
| Energy use per capita           | -27,88        | -47,22        | -56,57         | -62,69         | -81,6%         | -47,01         | -61,2%         |
| Electrification                 | -11,22        | -34,27        | -63,46         | -115,13        |                | -118,67        |                |
| Renewable fuels + heat          | -5,67         | -9,89         | -15,63         | -21,81         | -28,4%         | -27,43         | -35,7%         |
| District heat                   | -2,07         | -2,23         | -4,09          | -5,40          | -7,0%          | -7,56          | -9,8%          |
| CO2 intensity fossil fuels      | -10,06        | -16,51        | -28,68         | -61,16         | -79,6%         | -65,60         | -85,4%         |
| <b>Total</b>                    | <b>-45,41</b> | <b>-92,78</b> | <b>-143,01</b> | <b>-233,53</b> | <b>-303,9%</b> | <b>-227,89</b> | <b>-296,6%</b> |

| Index decomposition - Industry |               |               |               |               |               |               |               |
|--------------------------------|---------------|---------------|---------------|---------------|---------------|---------------|---------------|
| Italy-DDPP-DRS                 | 2010-2020     | 2010-2030     | 2010-2040     | 2010-2050     | 2010-2050     | 2010-2050     | 2010-2050     |
|                                | w/ steps      | w/o steps     | w/o steps     |
|                                | Mt CO2/a      | Mt CO2/a      | Mt CO2/a      | Mt CO2/a      | %             | Mt CO2/a      | %             |
| CO2 capture + sequestration    | 0,00          | 0,00          | -0,53         | -0,80         | -1,4%         | -0,80         | -1,4%         |
| Population                     | 1,79          | 2,49          | 2,74          | 2,58          | 4,5%          | 1,97          | 3,5%          |
| Energy use per capita          | -4,55         | -6,07         | -13,30        | -17,08        | -30,1%        | -16,34        | -28,8%        |
| Electrification                | -2,79         | -0,17         | 1,30          | -9,51         | -16,8%        | -10,93        | -19,3%        |
| Renewable fuels + heat         | -3,00         | -4,73         | -5,58         | -6,26         | -11,0%        | -6,01         | -10,6%        |
| Combined heat + power          | -2,89         | -4,61         | -4,67         | -5,05         | -8,9%         | -4,75         | -8,4%         |
| CO2 intensity fossil fuels     | 0,24          | 0,02          | -0,13         | 2,74          | 4,8%          | 3,48          | 6,1%          |
| <b>Total</b>                   | <b>-11,20</b> | <b>-13,07</b> | <b>-20,16</b> | <b>-33,37</b> | <b>-58,8%</b> | <b>-33,37</b> | <b>-58,8%</b> |

**Index decomposition - Energy supply**

|                             | 2010-2020     | 2010-2030     | 2010-2040      | 2010-2050      | 2010-2050     | 2010-2050      | 2010-2050     |
|-----------------------------|---------------|---------------|----------------|----------------|---------------|----------------|---------------|
| Italy-DDPP-DRS              | w/ steps      | w/ steps      | w/ steps       | w/ steps       | w/ steps      | w/o steps      | w/o steps     |
|                             | Mt CO2/a      | Mt CO2/a      | Mt CO2/a       | Mt CO2/a       | %             | Mt CO2/a       | %             |
| CO2 capture + sequestration | 0,00          | 0,00          | -4,00          | -6,00          | -4,4%         | -6,00          | -4,4%         |
| Population                  | 3,76          | 4,83          | 5,05           | 4,98           | 3,7%          | 2,40           | 1,8%          |
| Electricity use per capita  | -7,84         | -5,92         | -5,51          | -2,64          | -1,9%         | 8,80           | 6,5%          |
| Renewable electricity       | -40,77        | -55,61        | -91,88         | -110,61        | -81,4%        | -136,54        | -100,5%       |
| Nuclear                     | 0,00          | 0,00          | 0,00           | 0,00           | 0,0%          | 0,00           | 0,0%          |
| Import                      | 5,01          | 6,86          | 7,80           | 10,53          | 7,7%          | 5,80           | 4,3%          |
| Emission factor             | -13,47        | -29,83        | -33,30         | -29,40         | -21,6%        | -7,60          | -5,6%         |
| <b>Total</b>                | <b>-53,31</b> | <b>-79,67</b> | <b>-121,84</b> | <b>-133,15</b> | <b>-98,0%</b> | <b>-133,15</b> | <b>-98,0%</b> |

**Based on the following sources:**

IMAGE 450-NucOff-OPT: AMPERE database, <https://tntcat.iiasa.ac.at/AMPEREDB/dsd?Action=htmlpage&page=welcome>

PRIMES HiEffHiRES: AMPERE database, <https://tntcat.iiasa.ac.at/AMPEREDB/dsd?Action=htmlpage&page=welcome>

France-negaWatt: "Scenario négaWatt 2050" (négaWatt Association 2014),

Germany-KS95: "Climate protection scenario 2050", KS95 run (Repenning et al. 2015),

Italy-DDPP-DRS: "Pathways to deep decarbonisation in Italy", demand reduction scenario (Viridis et al. 2015)

UK-ZCB2030: "Zero Carbon Britain 2030" (Allen et al. 2013).

'Achievability of the Paris targets in the EU – the role of demand-side driven mitigation in different types of scenarios'  
 - Supplementary Material: Results of the index decomposition with (w/ steps) and without (w/o steps) time steps

| Index decomposition - Overall |                |                |                |                |                |                |                |
|-------------------------------|----------------|----------------|----------------|----------------|----------------|----------------|----------------|
|                               | 2010-2015      | 2010-2020      | 2010-2025      | 2010-2030      | 2010-2030      | 2010-2030      | 2010-2030      |
| UK-ZCB2030                    | w/ steps       | w/o steps      | w/o steps      |
|                               | Mt CO2/a       | Mt CO2/a       | Mt CO2/a       | Mt CO2/a       | %              | Mt CO2/a       | %              |
| CO2 capture + sequestration   | 0,00           | 0,00           | 0,00           | 0,00           | 0,0%           | 0,00           | 0,0%           |
| Population                    | 16,88          | 29,04          | 35,42          | 35,70          | 6,2%           | 5,03           | 0,9%           |
| Energy use per capita         | -111,15        | -184,62        | -232,26        | -235,18        | -40,9%         | -37,79         | -6,6%          |
| Electrification               | 19,75          | 29,89          | 19,52          | -24,57         | -4,3%          | -162,48        | -28,3%         |
| Renewable fuels + heat        | -22,05         | -52,09         | -88,41         | -135,14        | -23,5%         | -182,54        | -31,8%         |
| CO2 intensity power + heat    | -42,66         | -99,29         | -181,82        | -218,77        | -38,1%         | -197,60        | -34,4%         |
| CO2 intensity fossil fuels    | 3,51           | 3,35           | 3,40           | 3,60           | 0,6%           | 1,02           | 0,2%           |
| <b>Total</b>                  | <b>-135,72</b> | <b>-273,71</b> | <b>-444,16</b> | <b>-574,35</b> | <b>-100,0%</b> | <b>-574,35</b> | <b>-100,0%</b> |

| Index decomposition - Transport |               |               |                |                |                |                |                |
|---------------------------------|---------------|---------------|----------------|----------------|----------------|----------------|----------------|
|                                 | 2010-2015     | 2010-2020     | 2010-2025      | 2010-2030      | 2010-2030      | 2010-2030      | 2010-2030      |
| UK-ZCB2030                      | w/ steps      | w/ steps      | w/ steps       | w/ steps       | w/ steps       | w/o steps      | w/o steps      |
|                                 | Mt CO2/a      | Mt CO2/a      | Mt CO2/a       | Mt CO2/a       | %              | Mt CO2/a       | %              |
| Population                      | 6,22          | 10,72         | 13,21          | 13,33          | 6,4%           | 1,81           | 0,9%           |
| Activity                        | -13,45        | -23,45        | -29,28         | -29,58         | -14,2%         | -4,20          | -2,0%          |
| Energy intensity                | -25,68        | -58,22        | -85,91         | -88,46         | -42,5%         | -19,25         | -9,3%          |
| Electrification                 | -2,92         | -7,53         | -14,07         | -31,64         | -15,2%         | -62,78         | -30,2%         |
| Biofuels                        | -6,48         | -17,17        | -32,26         | -53,03         | -25,5%         | -73,74         | -35,5%         |
| Hydrogen                        | -0,98         | -2,53         | -4,74          | -19,58         | -9,4%          | -53,34         | -25,7%         |
| CO2 intensity fossil fuels      | 0,00          | 0,00          | 0,00           | 1,04           | 0,5%           | 3,57           | 1,7%           |
| <b>Total</b>                    | <b>-43,29</b> | <b>-98,17</b> | <b>-153,05</b> | <b>-207,93</b> | <b>-100,0%</b> | <b>-207,93</b> | <b>-100,0%</b> |

| Index decomposition - Buildings |               |               |               |                |                |                |                |
|---------------------------------|---------------|---------------|---------------|----------------|----------------|----------------|----------------|
|                                 | 2010-2015     | 2010-2020     | 2010-2025     | 2010-2030      | 2010-2030      | 2010-2030      | 2010-2030      |
| UK-ZCB2030                      | w/ steps      | w/ steps      | w/ steps      | w/ steps       | w/ steps       | w/o steps      | w/o steps      |
|                                 | Mt CO2/a      | Mt CO2/a      | Mt CO2/a      | Mt CO2/a       | %              | Mt CO2/a       | %              |
| Population                      | 3,27          | 5,37          | 6,53          | 6,59           | 5,4%           | 1,06           | 0,9%           |
| Energy use per capita           | -30,03        | -41,05        | -48,34        | -48,82         | -40,0%         | -7,75          | -6,4%          |
| Electrification                 | -19,43        | -36,09        | -55,54        | -80,70         |                | -115,45        |                |
| Renewable fuels + heat          | -8,41         | -18,22        | -29,67        | -42,70         | -35,0%         | -58,91         | -48,3%         |
| District heat                   | 0,00          | 0,00          | 0,00          | 0,00           | 0,0%           | 0,00           | 0,0%           |
| CO2 intensity fossil fuels      | 0,86          | 0,86          | 0,86          | 0,87           | 0,7%           | 0,09           | 0,1%           |
| <b>Total</b>                    | <b>-45,33</b> | <b>-70,91</b> | <b>-96,48</b> | <b>-122,06</b> | <b>-100,0%</b> | <b>-122,06</b> | <b>-100,0%</b> |

| Index decomposition - Industry |               |               |               |               |                |               |                |
|--------------------------------|---------------|---------------|---------------|---------------|----------------|---------------|----------------|
|                                | 2010-2015     | 2010-2020     | 2010-2025     | 2010-2030     | 2010-2030      | 2010-2030     | 2010-2030      |
| UK-ZCB2030                     | w/ steps       | w/o steps     | w/o steps      |
|                                | Mt CO2/a      | Mt CO2/a      | Mt CO2/a      | Mt CO2/a      | %              | Mt CO2/a      | %              |
| CO2 capture + sequestration    | 0,00          | 0,00          | 0,00          | 0,00          | 0,0%           | 0,00          | 0,0%           |
| Population                     | 1,49          | 2,55          | 3,14          | 3,17          | 6,3%           | 0,47          | 0,9%           |
| Energy use per capita          | -2,08         | -3,95         | -5,08         | -5,14         | -10,2%         | -0,83         | -1,6%          |
| Electrification                | -3,84         | -9,47         | -15,37        | -21,78        | -43,2%         | -24,68        | -48,9%         |
| Renewable fuels + heat         | -5,09         | -11,48        | -18,05        | -24,59        | -48,8%         | -25,23        | -50,0%         |
| Combined heat + power          | 0,00          | 0,00          | 0,00          | 0,00          | 0,0%           | 0,00          | 0,0%           |
| CO2 intensity fossil fuels     | -2,00         | -2,14         | -2,10         | -2,10         | -4,2%          | -0,17         | -0,3%          |
| <b>Total</b>                   | <b>-11,52</b> | <b>-24,49</b> | <b>-37,47</b> | <b>-50,44</b> | <b>-100,0%</b> | <b>-50,44</b> | <b>-100,0%</b> |

**Index decomposition - Energy supply**

|                             | 2010-2015     | 2010-2020     | 2010-2025      | 2010-2030      | 2010-2030      | 2010-2030      | 2010-2030      |
|-----------------------------|---------------|---------------|----------------|----------------|----------------|----------------|----------------|
| UK-ZCB2030                  | w/ steps      | w/ steps      | w/ steps       | w/ steps       | w/ steps       | w/o steps      | w/o steps      |
|                             | Mt CO2/a      | Mt CO2/a      | Mt CO2/a       | Mt CO2/a       | %              | Mt CO2/a       | %              |
| CO2 capture + sequestration | 0,00          | 0,00          | 0,00           | 0,00           | 0,0%           | 0,00           | 0,0%           |
| Population                  | 5,89          | 10,37         | 12,52          | 12,60          | 6,5%           | 1,71           | 0,9%           |
| Electricity use per capita  | 20,74         | 42,08         | 50,89          | 51,07          | 26,3%          | 6,36           | 3,3%           |
| Renewable electricity       | -31,25        | -75,64        | -171,51        | -210,88        | -108,7%        | -200,16        | -103,2%        |
| Nuclear                     | 2,89          | 16,41         | 24,31          | 24,49          | 12,6%          | 2,31           | 1,2%           |
| Import                      | -3,33         | -3,33         | -3,33          | -1,16          | -0,6%          | 2,19           | 1,1%           |
| Emission factor             | -30,52        | -70,04        | -70,04         | -70,04         | -36,1%         | -6,34          | -3,3%          |
| <b>Total</b>                | <b>-35,58</b> | <b>-80,15</b> | <b>-157,16</b> | <b>-193,93</b> | <b>-100,0%</b> | <b>-193,93</b> | <b>-100,0%</b> |

**Based on the following sources:**

IMAGE 450-NucOff-OPT: AMPERE database, <https://tntcat.iiasa.ac.at/AMPEREDB/dsd?Action=htmlpage&page=welcome>

PRIMES HiEffHiRES: AMPERE database, <https://tntcat.iiasa.ac.at/AMPEREDB/dsd?Action=htmlpage&page=welcome>

France-negaWatt: "Scenario négaWatt 2050" (négaWatt Association 2014),

Germany-KS95: "Climate protection scenario 2050", KS95 run (Repenning et al. 2015),

Italy-DDPP-DRS: "Pathways to deep decarbonisation in Italy", demand reduction scenario (Viridis et al. 2015)

UK-ZCB2030: "Zero Carbon Britain 2030" (Allen et al. 2013).

—

—

—

—

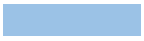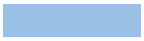

Supplement: MOESM1 [file 15755794]
